# Supplementary material for: How do aggregated patient-reported outcome measures data stimulate health care improvement? A realist synthesis
Source: PubMed Central journal article supplement — J Health Serv Res Policy. 2017 Dec 20;23(1):57–65. doi: 10.1177/1355819617740925 (PMC5768260; doi:10.1177/1355819617740925), 2017-12-20
Supplement: Appendix1.pdf [file Appendix1.pdf]

## Appendix 1: Search strategies

One example Medline search strategy is presented for literature reviews identifying i) reviews, ii) theories and iii evidence

- i. PROMs Feedback theories (identified through opinion pieces and commentaries)

Ovid MEDLINE(R) <1946 to April Week 3 2014>

- 1 Comment/ (535128)
- 2 Letter/ (808856)
- 3 Editorial/ (336724)
- 4 news/ or newspaper article/ (169377)
- 5 "Comment on".ti. (12027)
- 6 (letter\* adj3 editor\*).ti. (3046)
- 7 opinion\*.ti. (9839)
- 8 (view or views).ti. (37996)
- 9 comment.cm. (1007256)
- 10 or/1-9 [Commentary and Opinion Pieces] (1886406)
- 11 ("patient report\*" adj3 (outcome\* or data)).tw. (3342)
- 12 proms.tw. (151)
- 13 ("public\* report\*" adj3 (outcome\* or data or information or care)).tw. (295)
- 14 \*"Outcome Assessment (Health Care)"/ and (\*patient satisfaction/ or \*patient preference/ or \*Patient-Centered Care/ or \*Professional-Patient Relations/) (791)
- 15 ("public report\*" adj3 hospital\*).tw. (78)
- 16 (star adj2 rating\*).ti. (22)
- 17 or/11-16 [PROMS] (4403)
- 18 Patient Participation/ (17911)
- 19 quality indicators, health care/ (9977)
- 20 exp treatment outcome/ (640336)
- 21 (improve\* or impact\* or transform\* or feedback).ti. (321717)
- 22 exp Feedback/ (42542)
- 23 \*Attitude of health personnel/ (45015)
- 24 Quality of healthcare/ (56546)

25 or/18-24 [Feedback theories] (1084628)

26 10 and 17 and 25 [Proms Feedback Commentaries] (286)

ii. PROMs Feedback Reviews

Ovid MEDLINE(R) <1946 to April Week 3 2014>

1 ("patient report\*" adj3 (outcome\* or data)).tw. (3342)

2 proms.tw. (151)

3 ("public\* report\*" adj3 (outcome\* or data or information or care)).tw. (295)

4 exp \*Health Status Indicators/ and (\*patient satisfaction/ or \*patient preference/ or \*Patient-Centered Care/) (189)

5 \*"Outcome Assessment (Health Care)"/ and (\*patient satisfaction/ or \*patient preference/ or \*Patient-Centered Care/ or \*Professional-Patient Relations/) (791)

6 \*Self Report/ and \*Quality of Life/ (101)

7 \*"Quality of Life"/ and Health Status/ and patient satisfaction/ and ("Outcome Assessment (Health Care)"/ or Questionnaires/) (212)

8 ("public report\*" adj3 hospital\*).tw. (78)

9 (star adj2 rating\*).ti. (22)

10 or/1-9 [PROMS] (4813)

11 exp Decision Making/ (122197)

12 quality indicators, health care/ (9977)

13 exp treatment outcome/ (640336)

14 exp Feedback/ (42542)

15 ((PROM or PROMs or PRO) adj3 acceptab\*).tw. (16)

16 (improve\* or feedback).ti. (141142)

17 or/11-16 [Feedback theories] (925409)

18 10 and 17 [Proms Feedback] (1865)

19 limit 18 to "reviews (maximizes specificity)" (143)

20 (Review\* adj5 outcome\*).ab. (13974)

21 (Review\* adj7 outcome\*).ti. (2133)

22 (Review\* adj2 (PRO or PROM or PROMs)).tw. (117)

23 (review\* adj3 data).tw. (31333)

24 or/20-23 (46469)

25 18 and 24 (81)

26 19 or 25 (190)

iii. Evidence of Aggregated PROMs search for empirical studies for theory testing

Original search:

Provider feedback outcomes of PROMs or similar performance indicators. This search was ran twice:

Ovid MEDLINE(R) <1946 to October Week 2 2014>

And

Database: Ovid MEDLINE(R) <1946 to October Week 4 2016>

Search Strategy:

-----  
1 ("patient report\*" adj3 (outcome\* or data)).tw. (6283)

2 proms.tw. (382)

3 exp \*Health Status Indicators/ and (\*patient satisfaction/ or \*patient preference/ or \*Patient-Centered Care/) (221)

4 \*"Outcome Assessment (Health Care)"/ and (\*patient satisfaction/ or \*patient preference/ or \*Patient-Centered Care/ or \*Professional-Patient Relations/) (921)

5 \*Self Report/ and \*Quality of Life/ (266)

6 \*"Quality of Life"/ and Health Status/ and patient satisfaction/ and ("Outcome Assessment (Health Care)"/ or Questionnaires/) (237)

7 (star adj2 rating\*).ti. (34)

8 "quality and outcomes framework".tw. (311)

9 \*"Outcome Assessment (Health Care)"/mt, og (6318)

10 \*Questionnaires/ and \*Quality of Life/ (5642)

11 \*quality indicators, health care/ (7042)

12 (performance adj5 feedback).tw. (2633)

13 (performance adj3 results).tw. (8837)

14 (performance adj3 indicator\*).tw. (3162)

15 ("hospital performance" adj2 data).tw. (43)

- 16 benchmark\*.tw. (19472)
- 17 Benchmarking/ (11461)
- 18 (dashboard\* or "dash board\*").tw. (451)
- 19 (audit or audited or auditing).tw. (27120)
- 20 \*Management Audit/ or exp \*Clinical Audit/ (9565)
- 21 \*Total Quality Management/mt (1286)
- 22 (public\* report\* adj3 (performance or quality)).tw. (343)
- 23 or/1-22 [PROMs and Other Quality Indicators] (96074)
- 24 exp Decision Making/ (164052)
- 25 Decision\*.ti. (44141)
- 26 Feedback/ (27658)
- 27 (improve\* or feedback).ti. (172007)
- 28 ((public or publically) adj1 report\*).tw. (1071)
- 29 "Attitude of Health Personnel"/ (103170)
- 30 (improv\* adj2 participat\*).tw. (1165)
- 31 communication/ (71245)
- 32 or/24-31 [Agg Outcomes of Feedback] (529270)
- 33 23 and 32 [Proms Feedback] (10834)
- 34 qualitative\*.tw. (164576)
- 35 qualitative research/ (30021)
- 36 survey\*.ti. (104383)
- 37 attitude\*.ti. (36337)
- 38 (barrier\* or faciliator\*).ti. (35195)
- 39 limit 33 to "qualitative (maximizes specificity)" (637)
- 40 or/34-38 [Qualitative or survey] (342038)
- 41 23 and 32 and 40 (993)
- 42 39 or 41 (1080)

iv: Medline and Embase search for Patient experience data (example from Medline given)

Database: Ovid MEDLINE(R) <1946 to November Week 2 2014>

Search Strategy:

- 
- 1 inpatient survey.tw. (50)
  - 2 inpatient experience survey.tw. (2)
  - 3 GP survey.tw. (25)
  - 4 GP experience survey.tw. (0)
  - 5 (inpatient adj3 survey).tw. (157)
  - 6 (GP adj3 survey).tw. (125)
  - 7 5 or 6 (281)
  - 8 experience.tw. (429041)
  - 9 7 and 8 (36)
  - 10 1 or 2 or 3 or 4 or 9 (102)
