# Supplementary material for: How do aggregated patient-reported outcome measures data stimulate health care improvement? A realist synthesis
Source: PubMed Central journal article supplement — J Health Serv Res Policy. 2017 Dec 20;23(1):57–65. doi: 10.1177/1355819617740925 (PMC5768260; doi:10.1177/1355819617740925), 2017-12-20
Supplement: Table1.pdf [file Table1.pdf]

**Table 1: Programme theories underlying how PROMs data feedback will lead to improvements in patient care**

| Programme theory                                                                                                                                       | Intended mechanisms & outcomes                                                                                                                                                                                                                                                                                                                                                                                                                                                                                                                                                                                                                                                                                                           | Unintended mechanisms & outcomes                                                                                                                                                                                                                                                                                                                                                                                                                                                                                                                                        | Contextual factors                                                                                                                                                                                                                                                                                                                                                                                                                                                     |
|--------------------------------------------------------------------------------------------------------------------------------------------------------|------------------------------------------------------------------------------------------------------------------------------------------------------------------------------------------------------------------------------------------------------------------------------------------------------------------------------------------------------------------------------------------------------------------------------------------------------------------------------------------------------------------------------------------------------------------------------------------------------------------------------------------------------------------------------------------------------------------------------------------|-------------------------------------------------------------------------------------------------------------------------------------------------------------------------------------------------------------------------------------------------------------------------------------------------------------------------------------------------------------------------------------------------------------------------------------------------------------------------------------------------------------------------------------------------------------------------|------------------------------------------------------------------------------------------------------------------------------------------------------------------------------------------------------------------------------------------------------------------------------------------------------------------------------------------------------------------------------------------------------------------------------------------------------------------------|
| <p><b>Supporting patient choice:</b> PROMs and performance data can be used to support patient choice of providers<sup>1-5</sup></p>                   | <p>Patients will use PROMs data to choose higher performing providers and avoid poorer performing providers<sup>3</sup>.</p> <p>Poorer providers will either exit the market or feel threatened by the potential loss of market share and so take steps to improve patient care<sup>6</sup></p>                                                                                                                                                                                                                                                                                                                                                                                                                                          | <p>Providers will refuse to treat sicker patients in order to avoid worse outcomes<sup>7-9</sup></p> <p>Poorer performing providers exiting the market will reduce local provision and high performing hospitals may in turn be unable to manage demand for their services.<sup>10</sup></p> <p>Patients will not be aware of or able to access or understand the data, will not trust these data and so will not use these data to inform decisions<sup>5, 11, 12</sup></p> <p>Media coverage may mis-represent or obfuscate provider performance<sup>13, 14</sup></p> | <p>Complexity of data<sup>13</sup></p> <p>How data are presented<sup>5, 15</sup></p> <p>Number of providers within the local health economy<sup>16, 17</sup></p> <p>Patient characteristics<sup>10</sup></p> <p>Local demand for services<sup>16</sup></p>                                                                                                                                                                                                             |
| <p><b>Accountability:</b> PROMs data will enable stakeholders to hold providers to account for the quality of care provided<sup>1, 2, 18, 19</sup></p> | <p>Regulators/commissioners impose sanctions on poor performing providers (e.g. shifting contracts, public labelling as a poor performer or increased surveillance and reporting).</p> <p>Providers will feel threatened by the potential or actual sanctions and take steps to improve patient care<sup>13, 14, 17, 20</sup>.</p>                                                                                                                                                                                                                                                                                                                                                                                                       | <p>'Tunnel vision' or 'effort substitution' where providers focus on improving what is measured to the exclusion of other important areas of care<sup>3, 21, 22</sup></p> <p>Gaming to give the appearance of improved performance but without any real change in the underlying performance<sup>21, 23</sup></p> <p>Providers may be misclassified as a poor performer<sup>13</sup></p>                                                                                                                                                                                | <p>Organisational vs individual level data<sup>14</sup></p> <p>Level of support for indicators and fit with organisational goals<sup>17</sup></p> <p>Power relationships/degree of dependency between providers and commissioners/regulators<sup>13, 14, 17</sup></p> <p>Use of financial incentives and sanctions<sup>13</sup></p>                                                                                                                                    |
| <p><b>Provider benchmarking:</b> PROMs data will enable providers to compare their own performance with those of peers<sup>1, 2</sup></p>              | <p>Providers' professional ethos mean they are intrinsically motivated to maintain good patient care and will take steps to improve if feedback highlights a gap between their performance and expected standards<sup>3, 6, 24-26</sup></p> <p>Providers wish to protect their professional or institutional reputation which may have been damaged by being labelled a poor performer and so they take steps to improve care<sup>6, 13</sup></p> <p>Providers are competitive and take steps to improve patient care because they wish to be as good as or better than their peers<sup>27, 28</sup></p> <p>Providers identify high performing peers and seek to learn from their practices in order to improve care<sup>28-31</sup></p> | <p>Providers don't understand data<sup>32</sup></p> <p>Providers distrust, dismiss and ignore data<sup>13, 14, 33</sup></p>                                                                                                                                                                                                                                                                                                                                                                                                                                             | <p>Private vs public feedback of data<sup>7</sup></p> <p>Adequacy of case-mix adjustment<sup>32, 34</sup></p> <p>Degree of clinician involvement in development of measurement and feedback system<sup>5, 7, 35</sup></p> <p>Timeliness of data<sup>33, 36</sup></p> <p>How data are presented<sup>7, 37, 38</sup></p> <p>Skills/resources for data analysis<sup>36</sup></p> <p>Process vs outcome data<sup>39, 40</sup></p> <p>Level of aggregation<sup>41</sup></p> |

## References to tables

1. Department of Health. *Equity and Excellence: Liberating the NHS*. London: Department of Health, 2010.
2. Health and Social Care Information Centre. *Monthly Patient Reported Outcome Measures (PROMs) in England*. London: Health and Social Care Information Centre, 2015.
3. Marshall MN, Shekelle PG, Leatherman S and Brook RH. Public disclosure of performance data: learning from the US experience. *Quality in Health Care*. 2000; 9: 53-7.
4. Pinto DS and Pride YB. Paved with good intentions and marred by half-truths. *J Am Coll Cardiol*. 2013; 62: 416-7.
5. Marshall M and McLoughlin V. How do patients use information on health providers? *BMJ*. 2010; 341: c5272.
6. Hibbard J, Stockard J and Tusler M. Hospital performance reports: impact on quality, market share, and reputation. *Health Aff (Millwood)*. 2005; 24: 1150-60.
7. Naylor CD. Public profiling of clinical performance. *Journal of the American Medical Association*. 2002; 287: 1323-5.
8. Werner RM and Asch DA. The unintended consequences of publicly reporting quality information. *Journal of the American Medical Association*. 2005; 293: 1239-44.
9. BMA. BMA warns against simplistic surgeon tables. BMA, 2012.
10. Fotaki M. Patient choice and equity in the British National Health Service: towards developing an alternative framework. *Sociol Health Illn*. 2010; 32: 898-913.
11. Kullgren JT and Werner RM. Counterpoint: will public reporting of health-care quality measures inform and educate patients? No. *Chest*. 2011; 140: 1117-20; discussion 20-22.
12. West D. Exclusive: Patient choice is not key to improving performance, says Hunt. *Health Serv J*. 2014; 26th November, 2014.
13. Pawson R. Evidence and policy and naming and shaming. *Policy Studies*. 2002; 23: 211-30.
14. Exworthy M, Smith G, Gabe J and Jones IR. Disclosing clinical performance: the case of cardiac surgery. *J Health Organ Manag*. 2010; 24: 571-83.
15. Hibbard JH and Peters E. Supporting informed consumer health care decisions: data presentation approaches that facilitate the use of information in choice. *Annu Rev Public Health*. 2003; 24: 413-33.
16. Greener I. Are the assumptions underlying patients choice realistic?: a review of the evidence. *Br Med Bull*. 2007; 83: 249-58.
17. van Helden GV and Tilemma S. In search of a benchmarking theory for the public sector. *Financial Accountability & Management*. 2005; 21: 337-61.
18. National IAPT Programme Team. *The IAPT Data Handbook: Guidance on recording and monitoring outcomes to support local evidence-based practice* London: Crown Copyright, 2011.
19. Devlin NJ, Appleby J, Buxton M and Vallance-owen A. Getting the most out of PROMs: putting health outcomes at the heart of decision making. Kings Fund, 2010.
20. Oliver C. Strategic responses to institutional processes. *Academy of Management Review*. 1991; 16: 145-79.
21. Bevan G and Hood C. What's measured is what matters: targets and gaming in the English public health care system. *Public Administration*. 2006; 84: 517-38.
22. Holmstrom B and Milgrom P. Multitask principal-agent analysis: Incentive contracts, asset ownership and job design. *Journal of Law, Economics and Organization*. 1991; 7: 24-52.
23. Kelman S and Friedman JN. Performance improvement and performance dysfunction: An empirical examination of distortionary impacts on the emergency room wait-time target in the English National Health Service. *Journal of Public Administration Research and Theory*. 2009; 19: 917-46.
24. Carver CS and Schier MF. Control theory: a useful conceptual framework for personality-social, clinical, and health psychology. *Psychological Bulletin*. 1982; 92: 111-35.
25. Gardner B, Whittington C, McAteer J, Eccles MP and Michie S. Using theory to synthesise evidence from behaviour change interventions: the example of audit and feedback. *Soc Sci Med*. 2010; 70: 1618-25.

26. Kluger AN and DeNisi A. The effects of feedback interventions on performance: a historical review, a meta-analysis, and a preliminary feedback intervention theory. *Psychological Bulletin*. 1996; 119: 254-84.
27. Timmins N. NHS goes to the PROMS. *BMJ*. 2008; 336: 1464-5.
28. Wolfram Cox JR, Mann L and Samson D. Benchmarking as a mixed metaphor: disentangling assumptions of competition and collaboration. *Journal of Management Studies*. 1997; 34: 285-314.
29. Meade PH. A guide to benchmarking. *Curtin University of Technology*. 2007; October 2007: 1-24.
30. Department of Health. *Essence of Care*. London: Department of Health, 2010.
31. Moriarty JP and Smallman C. En route to a theory of benchmarking. *Benchmarking: An International Journal*. 2009; 16: 484-503.
32. Black N. Patient reported outcome measures could help transform healthcare. *BMJ*. 2013; 346.
33. Braithwaite J and Mannion R. Government plans for public reporting of performance data in health care: the case against. *Medical Journal of Australia*. 2011; 195: 41.
34. Marshall MN and Brook RH. Public reporting of comparative information about quality of healthcare. *Medical Journal of Australia*. 2002; 176: 205-6.
35. Wolpert M. Uses and abuses of patient reported outcome measures (PROMs): potential iatrogenic impact of PROMs implementation and how it can be mitigated. *Adm Policy Ment Health*. 2014; 41: 141-5.
36. Guerriere M. Determining the utility of public reporting--too early to judge. *Healthc Pap*. 2005; 6: 62-7.
37. Hawkes N. Patients' rating of treatment tells you more about patients than hospitals, research concludes. *BMJ (Clinical research ed)*. 2013; 347: f6916.
38. Black N and Jenkinson C. How can patients' views of their care enhance quality improvement? *BMJ*. 2009; 339: 202-5.
39. Lilford R, Brown CA and Nicholl J. Use of process measures to monitor the quality of clinical practice. *BMJ*. 2007; 335: 648-50.
40. Lilford R, Mohammed MA, Spiegelhalter B and Thomson R. Use and misuse of process and outcome data in managing performance of acute medical care: avoiding institutional stigma. *The Lancet*. 2004; 363: 1147-54.
41. Hysong SJ, Best RG and Pugh JA. Audit and feedback and clinical practice guidelines adherence: making feedback actionable. *Implementation Science*. 2006; 1.
