# Supplementary material for: How do aggregated patient-reported outcome measures data stimulate health care improvement? A realist synthesis
Source: PubMed Central journal article supplement — J Health Serv Res Policy. 2017 Dec 20;23(1):57–65. doi: 10.1177/1355819617740925 (PMC5768260; doi:10.1177/1355819617740925), 2017-12-20
Supplement: Table2.pdf [file Table2.pdf]

**Table 2: Propositions for theory testing and studies used to test the propositions**

| Proposition & linked sub-proposition                                                                                                                                                                                                     | Studies used to test the propositions                                                                                                                                                                                                                                                                                                                                                                                                                                                  | N studies                  |
|------------------------------------------------------------------------------------------------------------------------------------------------------------------------------------------------------------------------------------------|----------------------------------------------------------------------------------------------------------------------------------------------------------------------------------------------------------------------------------------------------------------------------------------------------------------------------------------------------------------------------------------------------------------------------------------------------------------------------------------|----------------------------|
| <b>1: The feedback of PROMS or performance data leads to improvements in patient care and outcomes</b>                                                                                                                                   |                                                                                                                                                                                                                                                                                                                                                                                                                                                                                        |                            |
| 1a: PROMs data will lead to improved patient outcomes                                                                                                                                                                                    | Time series analysis of changes in health gain, variation in performance and patient selection during the first three years of English PROMs programme <sup>1</sup><br>Cluster RCT of peer benchmarked PROMS feedback to surgeons following hip surgery in Ireland <sup>2</sup>                                                                                                                                                                                                        | 2 <sup>1, 2</sup>          |
| 1b: The public reporting of performance data leads to improved patient outcomes                                                                                                                                                          | Systematic reviews of public reporting as a quality improvement strategy <sup>3, 4</sup>                                                                                                                                                                                                                                                                                                                                                                                               | 2 <sup>3, 4</sup>          |
| <b>2: Feedback influences providers behaviour according to whether it is delivered privately (confidentially) or publicly</b>                                                                                                            |                                                                                                                                                                                                                                                                                                                                                                                                                                                                                        |                            |
| 2a: Providers respond to private/confidential feedback on performance                                                                                                                                                                    | Systematic review of impact of medical registries on quality of patient care <sup>5</sup><br>Survey of clinical audit leads for four national clinical audits in UK <sup>6</sup>                                                                                                                                                                                                                                                                                                       | 2 <sup>5, 6</sup>          |
| 2b: Public reporting of performance places additional pressure on providers to respond                                                                                                                                                   | Interrupted time series analysis of mortality rates for cardiac surgery before and after the introduction of public reporting in Ontario, Canada <sup>7</sup><br>Interrupted time series analysis of mortality rates for cardiac surgery before and after the introduction of public reporting in the northwest of England <sup>8</sup><br>Quasi-experimental study comparing no feedback, private feedback and public disclosure of performance data in Wisconsin US <sup>9, 10</sup> | 3 <sup>7-10</sup>          |
| <b>3: Public reporting of poor performance threatens provider's market share and prompts a significant provider response</b>                                                                                                             |                                                                                                                                                                                                                                                                                                                                                                                                                                                                                        |                            |
| 3a: Providers experience a change in their market share following public reporting of performance data<br>3b: Providers take steps to improve the quality of care because they are worried about potential threats to their market share | Systematic review of public reporting as a quality improvement strategy <sup>3</sup><br>Studies comparing changes in the market share of high and low performing hospitals in New York following the introduction of the New York State Cardiac Reporting System <sup>11-13</sup><br>Economic modelling of demand for hospitals in response to changes in PROMs scores, readmission rates and mortality in England between April 2010 and March 2013 <sup>14</sup>                     | 5 <sup>3, 11-13</sup>      |
| 3c: Providers perceive that public reporting of performance data poses a threat to their market share                                                                                                                                    | Quasi-experimental study comparing no feedback, private feedback and public disclosure of performance data in Wisconsin US <sup>9, 10</sup><br>Surveys of provider views and self-reported use of publicly reported performance data on Ontario, Canada <sup>15, 16</sup>                                                                                                                                                                                                              | 3 <sup>9, 10, 15, 16</sup> |
| <b>4: Providers perceived that report cards damage their professional or their hospitals' reputation</b>                                                                                                                                 |                                                                                                                                                                                                                                                                                                                                                                                                                                                                                        |                            |
| 4a: Providers perceive that public reporting of performance affects market share by damaging a hospitals reputation                                                                                                                      | Qualitative focus group study with patients and clinicians to explore views of PROMs data in England <sup>17</sup><br>Qualitative case study of six English NHS trusts to explore the impact of star performance ratings <sup>18</sup><br>Qualitative interview study with employers and managers to explore views and responses to                                                                                                                                                    | 4 <sup>17-20</sup>         |

|                                                                                                                                                                                                                                                                    |                                                                                                                                                                                                                                                                                                                                                                                                                                                                                                                                                                                                                                                                                                                                                                                                                                                                    |                         |
|--------------------------------------------------------------------------------------------------------------------------------------------------------------------------------------------------------------------------------------------------------------------|--------------------------------------------------------------------------------------------------------------------------------------------------------------------------------------------------------------------------------------------------------------------------------------------------------------------------------------------------------------------------------------------------------------------------------------------------------------------------------------------------------------------------------------------------------------------------------------------------------------------------------------------------------------------------------------------------------------------------------------------------------------------------------------------------------------------------------------------------------------------|-------------------------|
|                                                                                                                                                                                                                                                                    | publicly reported performance data in the US <sup>19</sup><br>Case study of NHS hospital in North of England to explore the effect of choice policies on patients and relationships within local health economies <sup>20</sup>                                                                                                                                                                                                                                                                                                                                                                                                                                                                                                                                                                                                                                    |                         |
| 4b: Media reports of hospital performance damage a hospital's reputation and affect their market share                                                                                                                                                             | Econometric modelling study examining impact of the public release of HFCA data on hospital market share in New York City <sup>21</sup><br>Econometric modelling study exploring the relationship between changes in market share and media stories concerning the HFCA data <sup>22</sup><br>A study analysing type, amount and themes of the newspaper coverage of the HFCA data <sup>23</sup><br>A survey of providers' views of the HFCA data <sup>24</sup>                                                                                                                                                                                                                                                                                                                                                                                                    | 4 <sup>21-24</sup>      |
| <b>5: Providers respond to the feedback of performance data through comparing themselves to their peers</b>                                                                                                                                                        |                                                                                                                                                                                                                                                                                                                                                                                                                                                                                                                                                                                                                                                                                                                                                                                                                                                                    |                         |
| 5: Providers respond to performance feedback through comparing themselves to their peers                                                                                                                                                                           | Qualitative focus group study with patients and clinicians to explore views of PROMs data in England <sup>17</sup><br>Qualitative interview study with stakeholders involved in a clinical led public reporting initiative in Wisconsin <sup>25</sup><br>Qualitative multiple case study involving interviews with stakeholders from six high performing hospitals in the US <sup>26</sup>                                                                                                                                                                                                                                                                                                                                                                                                                                                                         | 3 <sup>17, 25, 26</sup> |
| <b>6: Consumers choose hospitals on the basis of information about the quality of services</b>                                                                                                                                                                     |                                                                                                                                                                                                                                                                                                                                                                                                                                                                                                                                                                                                                                                                                                                                                                                                                                                                    |                         |
| Theory 6a: Patients are willing to move hospitals in response to poor performance<br>Theory 6b: Patients choose hospitals on the basis of reports about service quality<br>Theory 6c: Patients respond to poor hospital performance when it is report in the media | Systematic review of how consumers use quality of care information <sup>27</sup><br>National survey of patient experience of and views of patient choice in England in 2010 <sup>28</sup><br>Survey of patients who underwent surgery in the Netherlands to explore what factors informed their choice of hospital <sup>29</sup><br>Survey of patients attending four medical centres in Minneapolis to explore relative importance of different factors on their choice of hospital <sup>30</sup><br>Discrete choice experiment to examine the relative importance of quality of care information on patient's choice of hospital in the Netherlands <sup>31</sup><br>Mixed methods study including survey, discrete choice experiment and interviews with patients and GPs in four case studies to explore experiences and views of patient choice <sup>32</sup> | 6 <sup>27-32</sup>      |
| <b>7: Financial incentives and sanctions influence providers' response to the public reporting of performance data</b>                                                                                                                                             |                                                                                                                                                                                                                                                                                                                                                                                                                                                                                                                                                                                                                                                                                                                                                                                                                                                                    |                         |
| Theory 7a: Financial incentives accelerate and amplify the impact of public reporting and feedback of performance data on improvements to patient care                                                                                                             | Matched cohort study comparing change in quality hospital indicators over time between hospitals that engaged in public reporting only (HQA programme) and those that also volunteered to participate in a pay for performance scheme (HQID programme) in the US <sup>33</sup><br>Semi-structured interview study of group leaders within the Massachusetts Health Quality Partners Collaborative to identify characteristics of 'high' and 'low' engagement groups <sup>34</sup><br>Secondary analysis of national survey data (NSSMPP) of practices receiving QI support from the                                                                                                                                                                                                                                                                                | 4 <sup>33-36</sup>      |

|                                                                                                                                             |                                                                                                                                                                                                                                                                                                                                                                                                                                                                                                                                                                                       |                         |
|---------------------------------------------------------------------------------------------------------------------------------------------|---------------------------------------------------------------------------------------------------------------------------------------------------------------------------------------------------------------------------------------------------------------------------------------------------------------------------------------------------------------------------------------------------------------------------------------------------------------------------------------------------------------------------------------------------------------------------------------|-------------------------|
|                                                                                                                                             | Aligning Forces for Quality Programme to examine the impact of financial incentives on quality improvement <sup>35</sup><br>Longitudinal analysis comparing achievement rates for 23 activities included in the Quality and Outcomes Frame and 19 activities that were not included <sup>36</sup>                                                                                                                                                                                                                                                                                     |                         |
| Theory 7b: Providers do not make improvements to patient care in response to performance feedback when no financial incentives are attached | Qualitative interview study to explore primary care staff views on a set performance indicators developed and fed back to practices by a team of academics <sup>37</sup><br>Qualitative case studies of eight providers and health board responses to and use of the Clinical Resource and Audit Group (CRAG) indicators in Scotland <sup>38, 39</sup>                                                                                                                                                                                                                                | 2 <sup>37-39</sup>      |
| Theory 7c: Financial incentives attached to the feedback of performance data can lead to 'tunnel vision'                                    | Qualitative case study of six English NHS trusts to explore the impact of star performance ratings <sup>18</sup><br>Qualitative interview study to explore GPs views of the introduction of the routine collection of standardised depression questionnaires under the Quality and Outcomes Framework <sup>40</sup><br>Focus group study of primary care staff views on how the the introduction of the routine collection of standardised depression questionnaires under the Quality and Outcomes Framework influenced their management of depression in primary care <sup>41</sup> | 3 <sup>18, 40, 41</sup> |
| <b>8: The perceived credibility of performance data influences providers' responses to the feedback of performance data</b>                 |                                                                                                                                                                                                                                                                                                                                                                                                                                                                                                                                                                                       |                         |
| Theory 8a: The perceived credibility of the performance data influences providers' responses to performance data                            | Qualitative interview study of hospital staff in eight hospitals in the US to explore the barriers and facilitators to implementing data feedback for quality improvement in acute myocardial infarction <sup>42</sup><br>Qualitative interview study with employers and hospital managers to explore their responses to employer initiated 'report cards' in the US <sup>19</sup><br>Qualitative study nested within an RCT to explore surgeons views' of receiving peer benchmarked PROMS feedback to surgeons following hip surgery in Ireland <sup>43</sup>                       | 3 <sup>19, 42, 43</sup> |
| Theory 8b: The source of performance data influences providers' perceptions of its credibility                                              | Survey of providers' views of the California Hospital Outcomes Project (CHOP) reports one year after their release <sup>44</sup><br>Survey of providers' views of the California Hospital Outcomes Project (CHOP) reports three years after their release <sup>45</sup><br>Survey comparing providers views of the CHOP reports and the New York State Cardia Reporting system (NYSCRS) <sup>46</sup>                                                                                                                                                                                 | 3 <sup>44-46</sup>      |
| Theory 8c: The perceived underlying driver of public reporting systems influence providers' responses                                       | Qualitative interview study of provider views of the performance data produced by the Joint Commission on Accreditation of Healthcare Organizations (JCAHO) <sup>47</sup><br>Primary care providers' views and responses to feedback from the National GP Patient Survey in England <sup>48</sup><br>Secondary analysis of data collected as part of the Community Tracking Study (CTS) in the US to explore providers views of publicly reported data produced by JCAHO and the Centres for Medicare and Medicaid Services (CMS) <sup>49</sup>                                       | 4 <sup>26, 47-49</sup>  |
| Theory 8d: Clinicians have greater trust in clinician led                                                                                   | Qualitative interview study of Danish GPs' views of the Data Capture Programme, a GP led,                                                                                                                                                                                                                                                                                                                                                                                                                                                                                             | 4 <sup>25, 50-52</sup>  |

|                                                                                                                                                                                                                                                                |                                                                                                                                                                                                                                                                                                                                                                                                                                                                                                                                                                                                                                                                                                                                                                                                                                                                                                                                                                                                     |                     |
|----------------------------------------------------------------------------------------------------------------------------------------------------------------------------------------------------------------------------------------------------------------|-----------------------------------------------------------------------------------------------------------------------------------------------------------------------------------------------------------------------------------------------------------------------------------------------------------------------------------------------------------------------------------------------------------------------------------------------------------------------------------------------------------------------------------------------------------------------------------------------------------------------------------------------------------------------------------------------------------------------------------------------------------------------------------------------------------------------------------------------------------------------------------------------------------------------------------------------------------------------------------------------------|---------------------|
| reporting systems                                                                                                                                                                                                                                              | <p>voluntary feedback of indicators of outcomes for patient with chronic disease<sup>50</sup></p> <p>Case study of the set up a clinician led public reporting system, the Wisconsin Collaborative for Healthcare Quality (WCHQ)<sup>25</sup></p> <p>Longitudinal cohort study of the impact of the WCHQ on the initiation of quality improvement initiatives and hospital performance<sup>51, 52</sup></p>                                                                                                                                                                                                                                                                                                                                                                                                                                                                                                                                                                                         |                     |
| <b>9: The degree to which performance data are 'actionable' influences providers' responses to the feedback of performance data</b>                                                                                                                            |                                                                                                                                                                                                                                                                                                                                                                                                                                                                                                                                                                                                                                                                                                                                                                                                                                                                                                                                                                                                     |                     |
| Theory 9a: Patient experience data are actionable and enable providers to take steps to improve patient care                                                                                                                                                   | <p>Survey of hospital leaders attitudes to different publicly reported measures of health care quality<sup>53</sup></p> <p>Systematic review of use of national/large scale user experience surveys in local quality improvement work<sup>54</sup></p> <p>Randomised controlled trial of feedback of patient experience data in primary care in the Netherlands<sup>55</sup></p> <p>Longitudinal cohort study of changes in patient experience indicators on the Hospital Consumer Assessment of Healthcare Providers and Systems (HCAHPS) between 2008 and 2009<sup>56</sup></p> <p>Surveys of providers' views of the value, use and impact of patient experience surveys in the US<sup>57, 58</sup> and France<sup>59</sup></p> <p>Qualitative interview study of hospital providers' views of and use of patient experience surveys in England<sup>60</sup></p> <p>Qualitative interview study of primary care staff views of and use of patient experience surveys in England<sup>61</sup></p> | 9 <sup>55-61</sup>  |
| <p>Theory 9b: Making patient experience data more immediate and integrated into clinical discussion improves provider responses</p> <p>Theory 9c: Providing tailored support to interpret and act on patient experience data improves providers' responses</p> | <p>Pilot cluster randomised controlled trial of facilitated patient experience feedback in hospitals in England<sup>62</sup></p> <p>Qualitative case study of peer and research support on the use of patient experience data for quality improvement in the US<sup>63</sup></p>                                                                                                                                                                                                                                                                                                                                                                                                                                                                                                                                                                                                                                                                                                                    | 2 <sup>62, 63</sup> |

1. Varagunam M, Hutchings A, Neuberger J and Black N. Impact on hospital performance of introducing routine patient reported outcome measures in surgery. *Journal of Health Services & Research Policy*. 2014; 19: 77-84.
2. Boyce M.B. and Browne JP. The effectiveness of providing peer benchmarked feedback to hip replacement surgeons based on patient reported outcome measures - result from the PROFILE (Patient-Reported Outcomes: Feedback Interpretation and Learning Experiment) trial: a cluster randomised controlled study. *BMJ Open*. 2015; 5.
3. Totten AM, Wagner J, Tiwari A, O'Haire C, Griffin J and Walker M. Closing the quality gap: revisiting the state of the science (vol. 5: public reporting as a quality improvement strategy). *Evidence Report/Technology Assessments*. 2012: 1-645.

4. Campanella P, Vukovic V, Parente P, Sulejmani A, Ricciardi W and Specchia ML. The impact of Public Reporting on clinical outcomes: a systematic review and meta-analysis. *BMC Health Serv Res.* 2016; 16: 296.
5. van der Veer SN, de Keizer NF, Ravelli ACJ, Tenkink S and Jager KJ. Improving quality of care. A systematic review on how medical registries provide information feedback to health care providers. *International Journal of Medical Informatics.* 2010; 79: 305-23.
6. Taylor A, Neuburger J, Walker K, Cromwell D and Groene O. How is feedback from national clinical audits used? Views from English National Health Service trust audit leads. *Journal of Health Services Research & Policy.* 2016; 21: 91-100.
7. Guru V, Femes SE, Naylor CD, et al. Public versus private institutional performance reporting: what is mandatory for quality improvement? *Am Heart J.* 2006; 152: 573-8.
8. Bridgewater B, Grayson AD, Brooks N, et al. Has the publication of cardiac surgery outcome data been associated with changes in practice in northwest England: an analysis of 25 730 patients undergoing CABG surgery under 30 surgeons over eight years. *Heart.* 2007; 93: 744-8.
9. Hibbard J, Stockard J and Tusler M. Does publicizing hospital performance stimulate quality improvement efforts? *Health Aff (Millwood).* 2003; 24: 84-94.
10. Hibbard J, Stockard J and Tusler M. Hospital performance reports: impact on quality, market share, and reputation. *Health Aff (Millwood).* 2005; 24: 1150-60.
11. Chassin MR. Achieving and sustaining improved quality: lessons from New York State and cardiac surgery. *Health Aff (Millwood).* 2002; 21: 40-51.
12. Mukamel DB and Mushlin AI. Quality of care information makes a difference: an analysis of market share and price changes after publication of the New York State Cardiac Surgery Mortality Report. *Medical Care.* 1998; 36: 945-54.
13. Dranove D and Sfekas A. Start spreading the news: a structural estimate of the effects of New York hospital report cards. *Journal of Health Economics.* 2008; 27: 1201-7.
14. Gutacker N, Siciliani L, Moscelli G and Gravelle H. Choice of hospital: Which type of quality matters? *Journal of Health Economics.*
15. Tu JV and Cameron C. Impact of an acute myocardial infarction report card in Ontario, Canada. *Int J Qual Health Care.* 2003; 15: 131-7.
16. Guru V, David Naylor C, Femes SE, Teoh K and Tu JV. Publicly reported provider outcomes: The concerns of cardiac surgeons in a single-payer system. *Canadian Journal of Cardiology.* 2009; 25: 33-8.
17. Hildon Z, Allwood D and Black N. Patients' and clinicians' views of comparing the performance of providers of surgery: a qualitative study. *Health Expect.* 2012.
18. Mannion R, Davies H and Marshall M. Impact of star performance ratings in English acute hospital trusts. *Journal of Health Services & Research Policy.* 2005; 10: 18-24.
19. Mehrotra A, Bodenheimer T and Dudley RA. Employers' efforts to measure and improve hospital quality: determinants of success. *Health Aff (Millwood).* 2003; 22: 60-71.
20. Greener I and Mannion R. Patient choice in the NHS: what is the effect of patient choice policies on patients and relationships in health economies. *Public Money and Management.* 2009; 29: 95-100.
21. Vladeck BC, Goodwin EJ, Myers LP and Sinisi M. Consumers and hospital use: the HCFA 'death list'. *Health Aff (Millwood).* 1988; 7: 122-5.
22. Mennemeyer ST, Morrisey MA and Howard LZ. Death and reputation: how consumers acted upon the HCFA mortality information. *Inquiry.* 1997; 34: 117-28.
23. Rudd J and Glanz K. A survey of newspaper coverage of HCFA hospital mortality data. *Public Health Reports.* 1991; 106: 517-23.
24. Berwick D and Wald D. Hospital leaders' opinions of the HCFA mortality data. *Journal of the American Medical Association.* 1990; 263: 247-9.
25. Greer AL. Embracing accountability: physician leadership, public reporting, and teamwork in the Wisconsin Collaborative for Healthcare Quality. 2008.
26. Davies H. Public release of performance data and quality improvement: internal responses to external data by health care providers. *Quality in Health Care.* 2001; 10: 104-10.
27. Faber M, Bosch M, Wollersheim H, Leatherman S and Grol R. Public reporting in health care: how do consumers use quality-of-care information? A systematic review. *Medical Care.* 2009; 47: 1-8.
28. Dixon S. Report on the National Patient Choice Survey: February 2010 England. London: Department of Health, 2010.

29. Dijs-Elsinga J, Otten W, Versluijs MM, et al. Choosing a hospital for surgery: the importance of information on quality of care. *Medical Decision Making*. 2010; 30: 544-55.
30. Abraham J, CSick B, J. A, Berg A, Dehmer C and Tufano A. Selecting a provider: what factors influence patients' decision making? *Journal of Healthcare Management*. 2011; 52: 99-114.
31. Marang-van de Mheen PJ, Dijs-Elsinga J, Otten W, et al. The relative importance of quality of care information when choosing a hospital for surgical treatment: a hospital choice experiment. *Medical Decision Making*. 2011; 31: 816-27.
32. Dixon A, Robertson R, Appleby J, Burge P, devlin NJ and Magee H. Patient Choice: How patients choose and how providers respond. London: The King's Fund, 2010.
33. Lindenauer PK, Remus D, Roman S, et al. Public reporting and pay for performance in hospital quality improvement. *N Engl J Med*. 2007; 356: 486-96.
34. Friedberg MW, SteelFisher GK, Karp M and Schneider EC. Physician Groups' Use of Data from Patient Experience Surveys. *J Gen Intern Med*. 2011; 26: 498-504.
35. Alexander JA, Maeng D, Casalino LP and Rittenhouse D. Use of care management practices in small-and medium sized-physician groups: do public reporting of physician quality and financial incentives matter? *Health Serv Res*. 2013; 48: 376-87.
36. Doran T, Kontopantelis E, Valderas JM, et al. Effect of financial incentives on incentivised and non-incentivised clinical activities: longitudinal analysis of data from the UK Quality and Outcomes Framework. *BMJ*. 2011; 342.
37. Wilkinson EK, McColl A, Exworthy M, et al. Reactions to the use of evidence-based performance indicators in primary care: a qualitative study. *Quality in Health Care*. 2000; 9: 166-74.
38. Mannion R and Goddard M. Impact of published clinical outcomes data: case study in NHS hospital trusts *Quality in Health Care*. 2001; 323: 260-3.
39. Mannion R and Goddard M. Public disclosure of comparative clinical performance data: lessons from the Scottish experience. *Journal of evaluation in clinical practice*. 2003; 9: 277-86.
40. Dowrick C, Leydon GM, McBride A, et al. Patients' and doctors' views on depression severity questionnaires incentivised in UK quality and outcomes framework: qualitative study. *BMJ*. 2009; 338: b663.
41. Mitchell C, Dwyer R, Hagan T and Mathers N. Impact of the QOF and the NICE guideline in the diagnosis and management of depression: a qualitative study. *Br J Gen Pract*. 2011; 61: e279-89.
42. Bradley EH, Holmboe ES, Mattera JA, Roumanis SA, Radford MJ and Krumholz HM. Data feedback efforts in quality improvement: lessons learned from US hospitals. *Quality & safety in health care*. 2004; 13: 26-31.
43. Boyce M, Browne J and Greenhalgh J. Surgeon's experiences of receiving peer benchmarked feedback using patient-reported outcome measures: a qualitative study. *Implementation Science*. 2014; 9: 84.
44. Luce JM, Thiel GD, Holland MR, Swig L, Currin SA and Luft HS. Use of risk-adjusted outcome data for quality improvement by public hospitals. *The Western journal of medicine*. 1996; 164: 410-4.
45. Rainwater JA, Romano PS and Antonius DM. The California Hospital Outcomes Project: how useful is California's report card for quality improvement? *Jt Comm J Qual Improv*. 1998; 24: 31-9.
46. Romano PS, Rainwater JA and Antonius D. Grading the graders: how hospitals in California and New York perceive and interpret their report cards. *Medical Care*. 1999; 37: 295-305.
47. Hafner JM, Williams SC, Koss RG, Tschurtz BA, Schmaltz SP and Loeb JM. The perceived impact of public reporting hospital performance data: interviews with hospital staff. *Int J Qual Health Care*. 2011; 23: 697-704.
48. Asprey A, Campbell JL, Newbould J, et al. Challenges to the credibility of patient feedback in primary healthcare settings: a qualitative study. *Br J Gen Pract*. 2013; 63: e200-8.
49. Pham HH, Coughlan J and O'Malley AS. The impact of quality-reporting programs on hospital operations. *Health Aff (Millwood)*. 2006; 25: 1412-22.

50. Lippert ML, Kousgaard MB and Bjerrum L. General practitioners uses and perceptions of voluntary electronic feedback on treatment outcomes - a qualitative study. *BMC Family Practice*. 2014; 15: 193.
51. Lamb GC, Smith MA, Weeks WB and Queram C. Publicly reported quality-of-care measures influenced Wisconsin physician groups to improve performance. *Health Aff (Millwood)*. 2013; 32: 536-43.
52. Smith MA, Wright A, Queram C and Lamb GC. Public reporting helped drive quality improvement in outpatient diabetes care among Wisconsin physician groups. *Health Aff (Millwood)*. 2012; 31: 570-7.
53. Lindenauer PK, Lagu T, Ross JS, et al. Attitudes of hospital leaders toward publicly reported measures of health care quality. *JAMA Intern Med*. 2014; 174: 1904-11.
54. Haugum M, Danielsen K, Iversen HH and Bjertnaes O. The use of data from national and other large-scale user experience surveys in local quality work: a systematic review. *Int J Qual Health Care*. 2014; 26: 592-605.
55. Vingerhoets E, Wensing M and Grol R. Feedback of patients' evaluations of general practice care: a randomised controlled trial. *Quality in Health Care*. 2001; 10: 224-8.
56. Elliott MN, Lehrman WG, Goldstein EH, et al. Hospital Survey Shows Improvements In Patient Experience. *Health Aff (Millwood)*. 2010; 29: 2061-7.
57. Barr JK, Giannotti TE, Sofaer S, Duquette CE, Waters WJ and Petrillo MK. Using public reports of patient satisfaction for hospital quality improvement. *Health Serv Res*. 2006; 41: 663-82.
58. Geissler KH, Friedberg MW, SteelFisher GK and Schneider EC. Motivators and barriers to using patient experience reports for performance improvement. *Med Care Res Rev*. 2013; 70: 621-35.
59. Boyer L, Francois P, Doutre E, Weil G and Labarere J. Perception and use of the results of patient satisfaction surveys by care providers in a French teaching hospital. *Int J Qual Health Care*. 2006; 18: 359-64.
60. Reeves R and Seccombe I. Do patient surveys work? The influence of a national survey programme on local quality-improvement initiatives. *Quality & safety in health care*. 2008; 17: 437-41.
61. Boiko O, Campbell JL, Elmore N, Davey AF, Roland M and Burt J. The role of patient experience surveys in quality assurance and improvement: a focus group study in English general practice. *Health Expect*. 2014.
62. Reeves R, West E and Barron D. Facilitated patient experience feedback can improve nursing care: a pilot study for a phase III cluster randomised controlled trial. *BMC Health Serv Res*. 2013; 13: 259-.
63. Davies E, Shaller D, Edgman-Levitan S, et al. Evaluating the use of a modified CAHPS survey to support improvements in patient-centred care: lessons from a quality improvement collaborative. *Health Expect*. 2008; 11: 160-76.
